# Supplementary material
Source: PubMed Central journal article supplement (PMC5389936)

1 **ONLINE REPOSITORY**

2 **Proprotein convertases generate a highly functional heterodimeric form of thymic stromal**  
3 **lymphopoietin in humans**

4  
5 **Julie A. Poposki, MS<sup>a</sup>; Aiko I. Klingler, PhD<sup>a</sup>; Whitney W. Stevens, MD, PhD<sup>a</sup>; Anju T.**  
6 **Peters, MD<sup>a</sup>; Kathryn E. Hulse, PhD<sup>a</sup>; Leslie C. Grammer, MD<sup>a</sup>; Robert P. Schleimer,**  
7 **PhD<sup>a,b</sup>; Kevin C. Welch, MD<sup>b</sup>; Stephanie S. Smith, MD<sup>b</sup>; Douglas M Sidle, MD<sup>b</sup>; David B.**  
8 **Conley, MD<sup>b</sup>; Bruce K. Tan, MD<sup>b</sup>; Robert C. Kern, MD<sup>a,b</sup>; Atsushi Kato, PhD<sup>a,b\*</sup>.**

9  
10 <sup>a</sup> Division of Allergy-Immunology, Department of Medicine, Northwestern University Feinberg  
11 School of Medicine, Chicago, IL, USA.

12 <sup>b</sup> Department of Otolaryngology - Head and Neck Surgery, Northwestern University Feinberg  
13 School of Medicine, Chicago, IL, USA.

14  
15  
16 \* Address correspondence to Atsushi Kato, Ph.D.,  
17 Division of Allergy-Immunology, Northwestern University Feinberg School of Medicine,  
18 240 E. Huron, Room M305, Chicago, IL 60611 USA.  
19 Phone: 312-503-0086, FAX: 312-503-0078  
20 E-Mail: [a-kato@northwestern.edu](mailto:a-kato@northwestern.edu)

21

22

## 23 **Methods**

24

### 25 ***Patients and biopsies***

26 Patients with chronic rhinosinusitis (CRS) were recruited from the Otolaryngology clinic  
27 and the Northwestern Sinus Center of Northwestern Medicine. Nasal polyp tissue was obtained  
28 during routine endoscopic sinus surgery performed on patients with CRS. All subjects met the  
29 criteria for CRS as defined by the European Position Paper on Rhinosinusitis and Nasal Polyps  
30 2012 and the American Academy of Otolaryngology-Head and Neck Surgery Chronic  
31 Rhinosinusitis Task Force.<sup>E1, 2</sup> Patients with an established immunodeficiency, pregnancy,  
32 coagulation disorder or diagnosis of classic allergic fungal sinusitis, Churg-Strauss syndrome or  
33 cystic fibrosis were excluded from the study. Ethmoid and uncinata tissues from normal control  
34 subjects without a history of CRS were obtained during procedures for conditions other than  
35 CRS (septoplasty for nasal obstruction, transnasal endoscopy skull base procedures, repairs of  
36 facial fractures, treatment of nasal disorders in obstructive sleep apnea, etc.). Tonsil tissue was  
37 obtained during tonsillectomy and normal skin tissues were obtained from facelift procedures at  
38 the Otolaryngology clinic of Northwestern Medicine. All subjects signed informed consent forms  
39 and the protocol governing procedures for this study was approved by the Institutional Review  
40 Board of Northwestern University Feinberg School of Medicine (IRB Project Number:  
41 STU00080917).

42

### 43 ***Reagents and recombinant proteins***

44 BSA, Tween 20, DMSO, protease inhibitor cocktail (PIC, PN; P8340), Aprotinin,  
45 Leupeptin, E-64, Pepstatin A, Tosyllysine Chloromethyl Ketone Hydrochloride (TLCK), Tosyl

46 phenylalanyl chloromethyl ketone (TPCK), PMA and A23487 were purchased from Sigma-  
47 Aldrich (St. Louis, MO), Nafamostat mesylate, K579, Marimastat, UK370106, SSR69071,  
48 decanoyl-Arg-Val-Lys-Arg-chloromethylketone (CMK), recombinant PCSK2, PCSK3, PCSK7,  
49 IL-4, IFN- $\gamma$ , M-CSF and GM-CSF were purchased from R&D systems (Minneapolis, MN), DL-  
50 2-mercaptomethyl-3-guanidinoethylthiopropionic acid (MGTA) was purchased from EMD  
51 Millipore (Billerica, MA) and recombinant mature TSLP (M29-159) and IL-33 were purchased  
52 from BioLegend (San Diego, CA). Recombinant TSLP (M29-124) was synthesized at  
53 BioLegend. TSLP (131-159) peptide was synthesized at RS Synthesis (Louisville, KY).

54

#### 55 *Tissue homogenates*

56 Freshly obtained tissue specimens were weighed, and 1 ml of PBS was added for every 100  
57 mg of tissue. The tissue was then homogenized with a Bullet Blender Blue (Next Advance,  
58 Averill Park, NY) at setting 7 for 8 min at 4°C. After homogenization, the suspension was  
59 centrifuged at 4000 rpm for 20 min at 4°C and the supernatants were stored at -80°C. Before  
60 analysis, tissue homogenates were centrifuged at 16,000g for 15 min at 4°C and we used those  
61 supernatants for each assay.

62

#### 63 *TSLP cleavage assay and Western blot analysis*

64 Recombinant mature TSLP (M29-159) was preincubated with 1 mg/ml tissue extracts for 6  
65 or 24 hours. In some experiments, TSLP was incubated with NP extract in the presence of 1%  
66 DMSO (vehicle control), 1% PIC, 1  $\mu$ M Aprotinin (Serine protease inhibitor), 10  $\mu$ M  
67 Nafamostat mesylate (Serine protease inhibitor), 10  $\mu$ M Leupeptin (Serine/cystein protease  
68 inhibitor), 10  $\mu$ M E-64 (Cystein protease inhibitor), 10  $\mu$ M Pepstatin A (Aspartyl protease

69 inhibitor), 10  $\mu$ M K579 (DPP-IV inhibitor), 20  $\mu$ M Marimastat (Broad spectrum MMP  
70 inhibitor), 10  $\mu$ M UK370106 (MMP3/12 inhibitor), 1  $\mu$ M SSR69071 (elastase inhibitor), 200  
71  $\mu$ M TLCK (trypsin-like protease inhibitor), 200  $\mu$ M TPCK (chymotrypsin-like protease  
72 inhibitor) or 10  $\mu$ M CMK (subtilisin-like proprotein convertase inhibitor) for 6 hours. In some  
73 experiments, TSLP was incubated with cell-free supernatants from activated mast cells,  
74 eosinophils, neutrophils, M1 macrophages and M2 macrophages for 24 hours. Eosinophils and  
75 neutrophils were purified from human peripheral blood.<sup>E3</sup> In some experiments, TSLP was  
76 incubated with 40 U/ml tryptase (Enzo Life Sciences, Farmingdale, NY), 23 U/ml chymase  
77 (Enzo Life Sciences), 100  $\mu$ g/ml cathepsin D (Enzo Life Sciences) and 0.2 U/ml cathepsin G  
78 (EMD Millipore) for 24 hours. Mast cells were generated from human CD34+ hematopoietic  
79 progenitor cells, as described previously.<sup>E4</sup> M2 macrophages were differentiated from monocytes  
80 by culturing in the presence of 10 ng/ml GM-CSF for 6 days and then in the presence of 100  
81 ng/ml LPS and 20 ng/ml IFN- $\gamma$  for 24 hours. M1 macrophages were differentiated from  
82 monocytes by culturing in the presence of 25 ng/ml M-CSF for 6 days and then in the presence  
83 of 20 ng/ml IL-4 for 24 hours. Eosinophils, neutrophils, mast cells and macrophages were  
84 stimulated with 1  $\mu$ M PMA and 1  $\mu$ M A23487 for 6 hours and we used cell free supernatants in  
85 the assay. In some experiments, TSLP was incubated with recombinant PCSK2, PCSK3 or active  
86 PCSK7 for 6 or 24 hours. Recombinant PCSK7 (R&D systems) was in the proprotein form. To  
87 generate an active form, recombinant PCSK7 was incubated with 2  $\mu$ g/ml thermolysin (Sigma)  
88 for 4 hours at 37 °C and the enzymatic reaction was stopped by addition of 10 mM 1,10  
89 phenanthroline (Sigma).

90 Samples for Western blotting were dissolved in LDL sample buffer (Invitrogen). To detect  
91 TSLP, reduced samples were resolved on a 4-12% NuPAGE Bis-Tris Gel (Invitrogen) in an

92 MES buffer system and then proteins were transferred onto a PVDF membrane (Bio-Rad,  
93 Hercules, CA). In some experiments, samples were dissolved in DTT free LDL sample buffer to  
94 examine the effect of the reduction of TSLP. The membranes were blocked in blocking buffer  
95 for fluorescent western blotting (Rockland, Gilbertsville, PA) for more than 2 hours and  
96 subsequently incubated overnight at 4°C with 50 ng/ml biotinylated sheep anti-human TSLP  
97 polyclonal antibody (R&D systems) or 0.5 µg/ml rabbit anti-TSLP polyclonal antibody  
98 (Peprotech, Rocky Hill, NJ). Following primary antibody incubation, the membranes were  
99 washed repeatedly in 0.1% Tween 20/PBS and then labeled by 45 minutes incubation at room  
100 temperature with IRDye 700DX conjugated streptavidin (1:50,000, Rockland Immunochemicals,  
101 Gilbertsville, PA) or IRDye 800 conjugated donkey anti-rabbit IgG antibody (1:10,000,  
102 Rockland Immunochemicals). Protein was detected on an Odyssey Infrared Imaging System (Li-  
103 Cor Biosciences, Lincoln, NE).

104

#### 105 *Protein sequencing and mass spectrometry*

106 5 µM mature recombinant TSLP (M29-159) was incubated with 1 mg/ml NP extracts for 6  
107 or 24 hours. In some experiments, TSLP was incubated with NP extract in the presence of 1%  
108 PIC, 10 µM Nafamostat mesylate, 10 µM CMK or 100 µM MGTA. The cleaved products were  
109 separated by SDS-PAGE and then proteins were transferred onto a PVDF membrane. The N-  
110 terminal protein sequences of each product were determined by an Edman-based Applied  
111 Biosystems 492 Procise Protein Sequencer at Texas A&M University, within the Protein  
112 Chemistry Laboratory. Mass spectrometry was performed on a Shimadzu Axima CFR MALDI-  
113 TOF MS at the Texas A&M University. In some experiments, samples were treated with 25 mM  
114 DTT for 15 minutes before analyzing by MALDI-TOF MS.

115

116 ***Cell culture***

117 Buffy coats from human peripheral blood were obtained from American Red Cross (St.  
118 Paul, MN). Human PBMCs were isolated by centrifugation on a Ficoll-Paque PREMIUM  
119 density gradient (GE Healthcare, Piscataway, NJ). Monocytes and mDC1s were separated from  
120 human PBMC using the MACS system (Miltenyi Biotec, Auburn, CA) with anti-CD14  
121 MicroBeads (Miltenyi Biotec) or a CD1c+ Dendritic Cell Isolation Kit (Miltenyi Biotec)  
122 respectively. The purity of the monocytes (CD14+) and mDC1s (CD1c+, CD19-, CD11c+) was  
123 determined by flow cytometry and always exceeded 90%. The cells were suspended in RPMI  
124 1640 medium (Invitrogen) supplemented with 10% FBS (Invitrogen), 100 U/ml penicillin, and  
125 100 µg/ml streptomycin (Invitrogen). The cells were stimulated with TSLP (M29-159), TSLP  
126 (M29-124), TSLP (131-159), PCSK-treated TSLP and 10 ng/ml IL-33 for 48 (CCL17) or 72 (IL-  
127 5) hours. To generate TSLP (M29-130 + 131-159), 10 µM recombinant TSLP mature (M29-159)  
128 was incubated with 1 µM PCSK3 or 150 nM active PCSK7 for 24 hours. The effect of truncation  
129 was determined by SDS-PAGE, western blot and MALDI-TOF MS under reducing conditions.  
130 We used PCSK-treated TSLP in our *in vitro* cell culture study if the efficiency of truncation  
131 exceeded 98%. The CCL17 and IL-5 concentrations in the supernatant were measured with  
132 DuoSet ELISA kits (R&D Systems).

133

134 ***Real-time RT-PCR***

135 A portion of nasal tissues for isolation of RNA was transferred to RNAlater (Ambion,  
136 Austin, TX) and stored at -20°C. Total RNA from sinus tissue was extracted using QIAzol  
137 (Qiagen, Valencia, CA) and was cleaned and treated with DNase I using NucleoSpin RNA

138 (Clontech Laboratories, Mountain View, CA) according to the manufacturer's instructions. The  
139 quality of total RNA from sinus tissue was assessed with a 2100 Bioanalyzer (Agilent  
140 Technologies, Santa Clara, CA) using a RNA 6000 Nano LabChip (Agilent Technologies). RNA  
141 in which RIN was greater than 7.0 was used for cDNA synthesis. Total RNA from 5 donor  
142 pooled human adult skin, lung and liver tissues was purchased from BioChain Institute (Newark,  
143 CA). Single-strand cDNA was synthesized with SuperScript II reverse transcriptase (Invitrogen,  
144 Carlsbad, CA) and random primers. Real-time RT-PCR was performed with a TaqMan method  
145 using a StepOnePlus Real-Time PCR System (Applied Biosystems, Foster City, CA) in 20  $\mu$ l  
146 reactions (10  $\mu$ l 2x TaqMan Fast Advanced Master Mix (Applied Biosystems), 1  $\mu$ l 20x primer  
147 and probe mixture for target gene, 1  $\mu$ l 20x primer and probe mixture for  $\beta$ -glucuronidase  
148 (GUSB) plus cDNA equivalent to 10 ng of total RNA). Primer and probe sets for PCSK1  
149 (Hs.PT.56a.20110761), PCSK2 (Hs.PT.56a.3835659), PCSK3 (FURIN: Hs.PT.56a.21271756),  
150 PCSK4 (Hs.PT.56a.39453462), PCSK5 (Hs.PT.56a.28190137), PCSK6 (Hs.PT.56a.3163847),  
151 PCSK7 (Hs.PT.56a.22452484), CPN1 (Hs.PT.58.1675481) and CPN2 (Hs.PT.58.21352543.g)  
152 were purchased from Integrated DNA Technologies (Coralville, IA). Primer and probe set for  $\beta$   
153 -glucuronidase (GUSB; Human  $\beta$ -glucuronidase endogenous control, PN; 4326320E) was  
154 purchased from Applied Biosystems. The mRNA expression levels were normalized by the  
155 expression of a housekeeping gene, GUSB. Expression of GUSB was not significantly different  
156 between control ethmoid tissues and NPs (data not shown).

157

### 158 *Statistics*

159 All data are reported as the mean  $\pm$  SEM. Differences between groups were analyzed using  
160 the Paired *t*-test and the Wilcoxon matched-pairs signed rank test. All statistical analyses were

161 performed using GraphPad prism 6.04 software (La Jolla, CA). A *p*-value of less than 0.05 was

162 considered significant.

163

164



165 **Results**

166

167 ***Development of PBMC-based TSLP bioassay***

168

169 Although we previously found that NP extract-pretreated TSLP (a mixture of mature and  
170 truncated TSLP) had higher activity than mature TSLP using a mast cell based bioassay,<sup>E4</sup> the  
171 functional activity of the isolated truncation products of TSLP was not known. Ito *et al.*,  
172 previously reported that TSLP induced production of CCL17 in myeloid DCs (mDCs).<sup>E5</sup>  
173 Therefore we stimulated PBMCs, mDC1s, CD14+ monocytes and CD1c, CD14, CD19 positive  
174 cell-depleted PBMCs with mature TSLP and monitored the production of CCL17 in those cell  
175 types. We found that PBMCs and mDC1s but not monocytes or PBMCs depleted of CD1c,  
176 CD14 and CD19 produced CCL17 after stimulation with TSLP (Supplementary Fig. S1A). We  
177 also found that NP homogenate treated TSLP induced more CCL17 than mature TSLP in  
178 PBMCs (Supplementary Fig. S1B). Since CD1c positive cell (mDC1)-depleted PBMCs did not  
179 produce CCL17 upon treatment with TSLP, we concluded that the production of CCL17 by  
180 TSLP in PBMCs was mediated by the activation of blood mDC1s. Therefore we used PBMCs  
181 for the TSLP bioassay instead of mast cells and monitored the production of CCL17 as a marker  
182 of TSLP-mediated activation of mDC1s in PBMCs.

183

184

185 **References**

186

187 E1. Fokkens WJ, Lund VJ, Mullol J, Bachert C, Alobid I, Baroody F, et al. European Position  
188 Paper on Rhinosinusitis and Nasal Polyps 2012. *Rhinol Suppl* 2012;3, 1-298.

189 E2. Rosenfeld RM, Andes D, Bhattacharyya N, Cheung D, Eisenberg S, Ganiats TG, et al.  
190 Clinical practice guideline: adult sinusitis. *Otolaryngol Head Neck Surg* 2007; **137**:S1-31.

191 E3. Paposki JA, Uzzaman A, Nagarkar DR, Chustz RT, Peters AT, Suh LA, et al. Increased  
192 expression of the chemokine CCL23 in eosinophilic chronic rhinosinusitis with nasal  
193 polyps. *J Allergy Clin Immunol* 2011; **128**:73-81 e4.

194 E4. Nagarkar DR, Paposki JA, Tan BK, Comeau MR, Peters AT, Hulse KE, et al. Thymic  
195 stromal lymphopoietin activity is increased in nasal polyps of patients with chronic  
196 rhinosinusitis. *J Allergy Clin Immunol* 2013; **132**:593-600 e12.

197 E5. Ito T, Wang YH, Duramad O, Hori T, Delespesse GJ, Watanabe N, et al. TSLP-activated  
198 dendritic cells induce an inflammatory T helper type 2 cell response through OX40  
199 ligand. *J Exp Med* 2005; **202**:1213-23.

200

201 **FIGURE LEGENDS**

202

203 **Supplementary Fig. S1. Myeloid DC mediated production of CCL17 by TSLP in PBMCs.**

204 PBMCs, mDC1s, monocytes and CD1c+, CD14+ and CD19+ cell-depleted PBMCs were  
205 stimulated with medium control or 100 pg/ml recombinant mature TSLP for 48 hours (A).  
206 PBMCs were stimulated with 10-1000 pg/ml mature TSLP or NP-treated TSLP for 48 hours (B).  
207 Concentrations of CCL17 protein in the culture supernatant were measured by ELISA. Results  
208 shown are mean  $\pm$  SEM of 3 (A) or 4 (B) independent experiments. Differences between TSLP  
209 and NP-treated TSLP were analyzed using the Paired *t* test and the Wilcoxon matched-pairs  
210 signed rank test (B). \*  $p < .05$ .

211

212 **Supplementary Fig. S2. TSLP (M29-124) does not activate mDC1s in PBMCs.**

213 Recombinant TSLP (M29-124) was synthesized at BioLegend. The purity of recombinant  
214 TSLP (M29-124) was greater than 98% as analyzed by HPLC (A) and SDS-PAGE (not shown).  
215 Molecular mass was detected as 11,014 by ESI-TOF MS (B). 11,014 *m/z* protein converted to  
216 10,713 *m/z* in the presence of DTT (B). PBMCs were incubated with TSLP (M29-159), TSLP  
217 (M29-124) and DTT-pretreated TSLP (M29-124) for 48 hours (C). Concentrations of CCL17  
218 protein in the culture supernatant were measured by ELISA. Results shown are mean  $\pm$  SEM of 3  
219 independent experiments.

220

221 **Supplementary Fig. S3. PCSKs generate TSLP (29-130 + 131-159) in NPs.**

222 Recombinant mature TSLP (M29-159) was incubated with 1  $\mu$ M PCSK3 for 24 hours and  
223 truncated products were detected by MALDI-TOF MS in the presence or absence of 25 mM

224 DTT.

225

226 **Supplementary Fig. S4. Serine protease inhibitor does not block 6 amino acid deletions**  
227 **from PCSK-treated TSLP by NP extracts**

228 Recombinant mature TSLP (M29-159) and PCSK3-treated TSLP (TSLP/PCSK3) were  
229 incubated with NP extract in the presence of 1% PIC, 10  $\mu$ M CMK or 10  $\mu$ M Nafamostat for 3  
230 hours. Truncated products were detected by MALDI-TOF MS in the presence of 25 mM DTT.  
231 The x-axis of the mass spectra represents mass to charge ratio ( $m/z$ ).

232

233 **Supplementary Fig. S5. Expression of PCSKs and CPN in NPs.**

234 The gene expression of PCSK1-7 (also known as proprotein convertase 1 (PC1), PC2, furin,  
235 PC4, PC5, paired basic amino acid cleaving enzyme 4 (PACE4) and PC7, respectively),  
236 carboxypeptidase N subunit 1 (CPN1) and subunit 2 (CPN2) in normal ethmoid sinus tissues  
237 (ET) (n=8), NP tissues (n=8), lung (pooled), skin (pooled), liver (pooled), M1 macrophages  
238 (n=3), M2 macrophages (n=3), neutrophils (n=3) and mast cells (n=4) was measured by using  
239 real-time RT-PCR. Gene expression was normalized by a housekeeping gene, GUSB and  
240 expression levels were shown as % expression of GUSB. Pooled RNA from human liver was  
241 used as a positive control of the expression of CPN1 and CPN2. Differences between ET and NP  
242 were analyzed using the Mann Whitney test.

243

244 **Supplementary Fig. S6. Digestion of TSLP by mast cell proteases**

245

246 Recombinant mature TSLP (M29-159) was incubated with 1 mg/ml NP extracts, 40 U/ml

247 tryptase, 23 U/ml chymase, 100  $\mu$ g/m cathepsin D and 0.2 U/ml cathepsin G for 24 hours.

248 Truncated products were determined by western blot under reducing conditions using anti-TSLP

249 antibody.

250

251

252

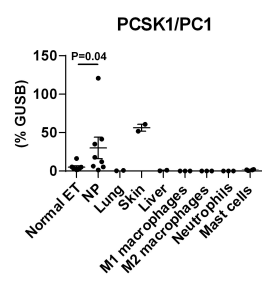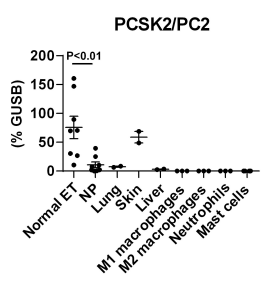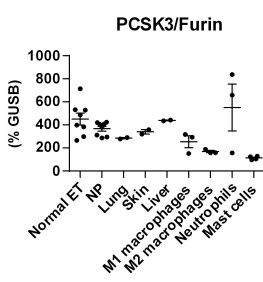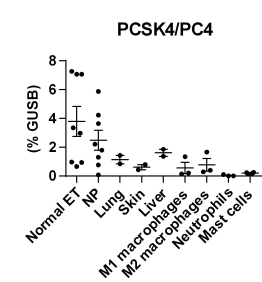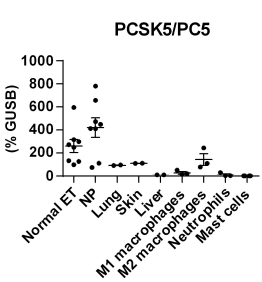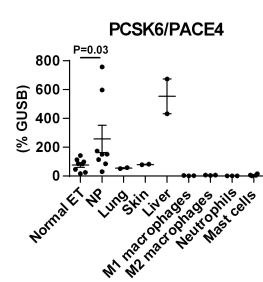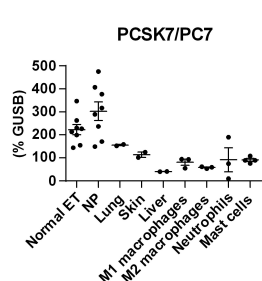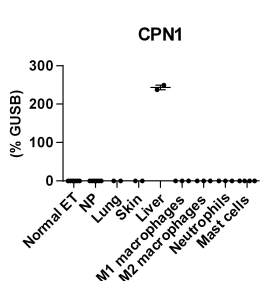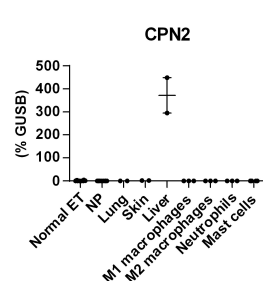

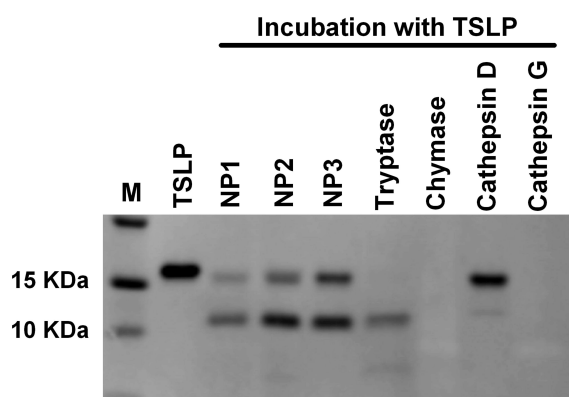

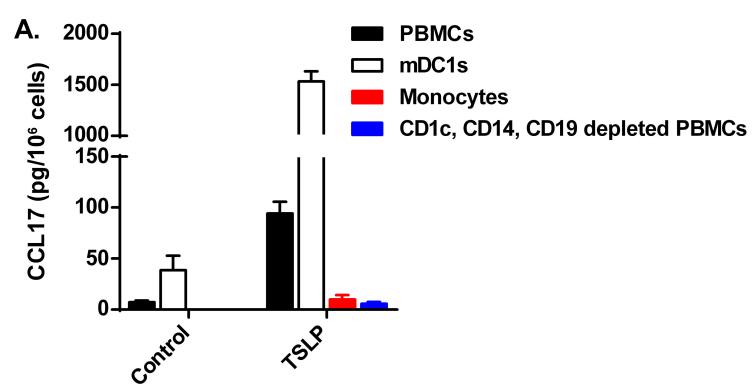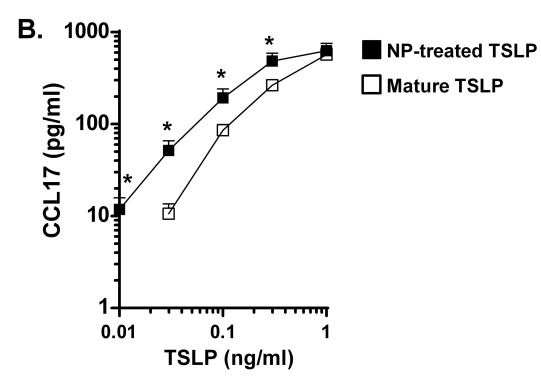



### A. HPLC analysis

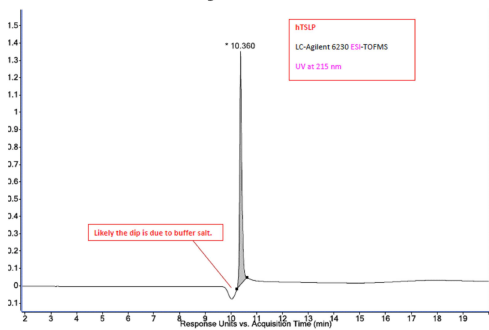

### B. ESI-TOF MS analysis

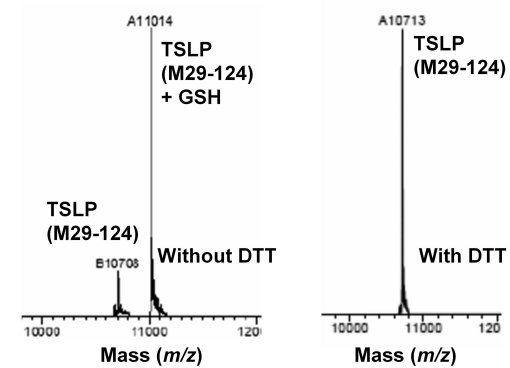

### C. PBMC-based bioassay

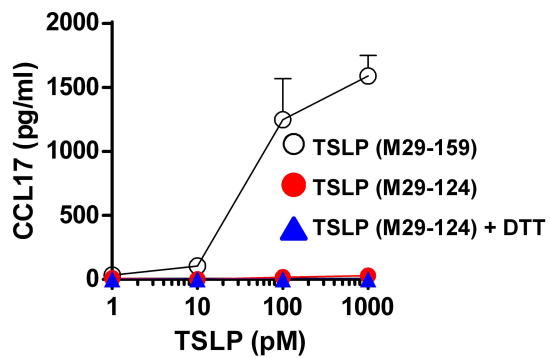

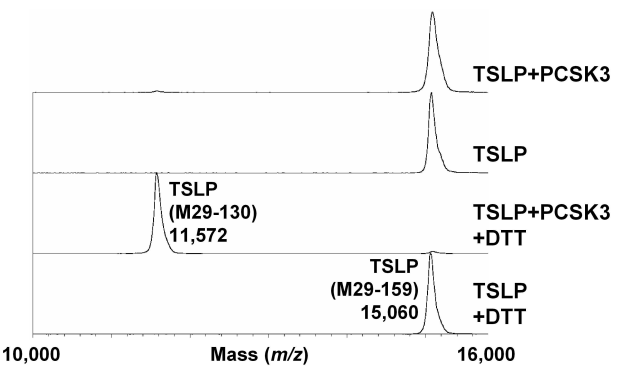

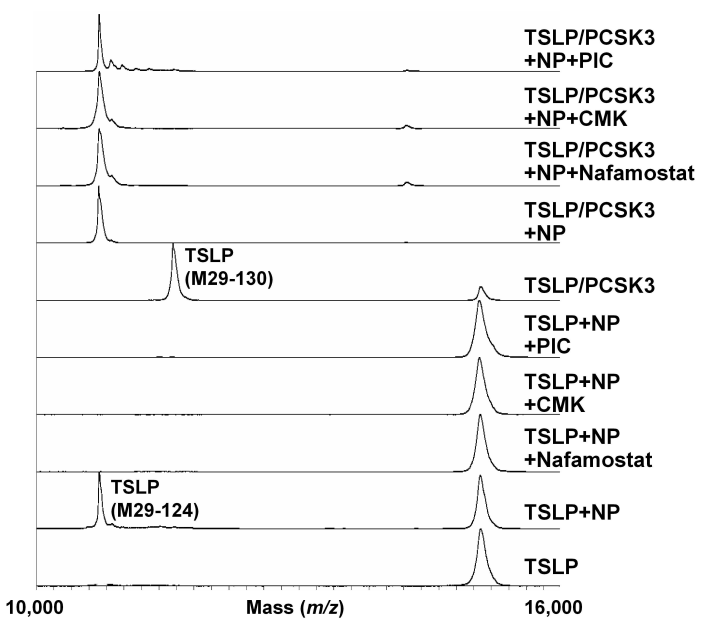

Supplement: NIHMS822644-supplement-01.pdf [file NIHMS822644-supplement-01.pdf]
